# Supplementary material
Source: PubMed Central journal article supplement (PMC3289349)
Supplement: 1111576109_sapp.pdf [file 1111576109_sapp.pdf]

## Supporting Information for

### Regional drought-induced reduction in biomass carbon sinks of Canada's boreal forests

Zhihai Ma<sup>a,1,\*</sup>, Changhui Peng<sup>a,b,1,2\*</sup>, Qian Zhu<sup>b</sup>, Huai Chen<sup>b</sup>, Guirui Yu<sup>c</sup>, Weizhong Li<sup>b</sup>, Xiaolu Zhou<sup>a</sup>, Weifeng Wang<sup>a</sup> and Wenhua Zhang<sup>a</sup>

## Materials and Methods

### Data selection and analysis

For our analysis, forest plots from Canada's boreal forest region were strictly selected based on the following criteria: (1) All plots were in natural forest stands, which we defined as stands that reproduced naturally rather than regenerated by sowing or planting. (2) Because at least two different time intervals were required to compare changes in aboveground live biomass, all plots had at least three consecutive censuses. (3) We required all plots with complete tree recruitment and mortality records. In addition, every tree above a defined diameter at breast height (DBH, 1.3 m above the ground) was measured during the initial census. (4) The individual trees must have been clearly marked and repeatedly measured. (5) To detect potential long-term changes in aboveground live biomass, all plots had at least 10 years of observation between their first and last census. (6) To avoid biomass changes caused by disturbance, we chose only plots with no evidence of fire, flood, storm, or insect disturbance and no evidence of forest management such as thinning or harvesting. (7) To minimize biomass changes associated with stand development and succession, the stand age was  $\geq 80$  years in all plots. This age was chosen based on the mature ages of the major species in Canada's boreal forest (i.e., *S1*, *S2*). The stand ages were obtained by counting tree rings in increment cores of the largest trees or from available historical records. (8) To reduce random variation in plot-level aboveground live biomass, we only used plots with a large enough number of live trees ( $\geq 80$ ) at their initial census (Table S1). (9) To obtain climatic data for each plot, the spatial location of all plots was required.

To find data that met these criteria, we selected and thoroughly reviewed data from permanent sample plots (PSPs) in Alberta (*S3*), Saskatchewan (*S4*), Manitoba (*S5*), Ontario (*S6*), and Quebec (*S7*). We did not consider PSP data from British Columbia and New Brunswick because most plots in these two provinces were not boreal forest types. The main objectives in permanent sample plot sampling are to assess stand dynamics such as succession, regeneration, ingrowth and mortality, to provide a data base that can be used to develop yield curves, to provide representative areas for study of management techniques, and to monitor provincial forest resources. The Alberta's PSPs have been established since 1960 by Forest Management

Branch of Alberta (*S3*). The PSPs are re-measured by different schedules to monitor the stand dynamics of different types of stands. The Saskatchewan's PSPs were built by the Department of Tourism and Renewable Resources Forestry Branch, Forest Inventory Section of Saskatchewan since 1960 (*S4*). Some new permanent sample plots were established from time to time in each of the surveys to replace those destroyed by fire, harvesting etc. The Manitoba's PSPs were established and measured by the Forestry Branch of Manitoba since 1970s (*S5*). The Ontario's PSPs were established and monitored by the Ministry of Natural Resources and Ontario Forest Research Institute since 1990 (*S6*). More than 4,000 PSPs in managed and natural forests were established across the Ontario province. Since 1970, approximately 12,000 permanent sample plots have been progressively established and inventoried by the ministère des Ressources naturelles et de la Faune du Québec (MRNFQ) (*S7*). Although there were many PSPs for each province (i.e., 580 plots for Alberta, 2426 plots for Saskatchewan, 368 plots for Manitoba, more than 4000 plots for Ontario, and about 12 000 plots for Quebec), most of the plots did not meet our criteria, either because they did not have three or more censuses or they were not located in undisturbed mature forest. Finally, ninety-six plots were selected (Table *S1*).

To obtain the climatic variables associated with the individual plots, we used data from the daily 10-km raster-gridded climate dataset for Canada from 1961 to 2003 (*S8*), which contains data for daily maximum temperature ( $^{\circ}\text{C}$ ;  $T_{\max}$ ), minimum temperature ( $^{\circ}\text{C}$ ;  $T_{\min}$ ), and precipitation (mm; *PCP*) for the Canadian landmass south of  $60^{\circ}\text{N}$ . The  $10 \times 10$  km grids were interpolated from daily Environment Canada climate station observations using a thin-plate-smoothing spline-surface-fitting method implemented by the ANUSPLIN V4.3 software (*S9*). The climatic data for plots with census years after 2003 were downloaded from the nearest climate stations (Table *S3*, *S10*). We used the annual climate moisture index (*CMI*) (cm) (*S10*) to indicate the annual climatic water deficit. Monthly *CMI* values were calculated as monthly *PCP* minus *PET*, where *PET* is the potential evapotranspiration, which is estimated from  $T_{\max}$ ,  $T_{\min}$ , and elevation (*S10*). Annual *CMI* was calculated by summing the monthly *CMI* values from January through December.

Positive *CMI* values indicate relatively moist conditions and negative *CMI* values indicate relatively dry conditions. In addition to the annual *CMI*, we also calculated the annual moisture index (*AMI*) (*S11*), which is defined as the ratio of the annual number of degree-days above  $5^{\circ}\text{C}$  to the mean annual precipitation. Large values of *AMI* indicate dry conditions due to high heat (thus, high evaporative demand) relative to the available moisture, whereas low values of *AMI* represent relatively wet conditions. Therefore, the larger the value of *AMI*, the greater the probability of drought. Both *CMI* and *AMI* were used to measure climatic water deficits in this

study. The annual mean temperature and annual precipitation were also calculated. To model the changes in aboveground biomass as a function of climatic parameters, we averaged the annual climatic variables across all years within each census interval for a given plot.

### **Estimation of Aboveground Stand Biomass**

We calculated the aboveground stand biomass at each census using published Canadian national equations for aboveground tree biomass (*S12*). The biomass densities were calculated from total, plot-level biomass divided by plot area. We identified measurement errors by comparing multiple measurements of the same tree between censuses; where we found a decrease in tree diameter, we corrected the problem by interpolating between the previous and subsequent census data (*S13*). Because tree height was not available for every tree, we used DBH-based biomass equations. Based on DBH, we first calculated the total dry biomass of a living tree by summing the dry biomass components of its wood, bark, foliage, and branches (each calculated using the corresponding equation; *S12*). We then calculated plot-level biomass as the sum of the biomass of all living trees in the plot (Table *S2*). We estimated the rate of biomass change per year for the western (Alberta, Saskatchewan, and Manitoba) and eastern (Ontario and Quebec) regions as well as for Canada's southern boreal forest as a whole. We calculated the changes in plot biomass between successive census dates and then divided this by the number of calendar years between the two censuses to calculate the annual rate of change. Finally, we derived the rate of biomass change per year by averaging the change rates across all plots (Fig. 2).

### **Statistical analysis**

To account for the variations and correlations that result from the hierarchical structure of our data (i.e., repeated measurements were nested within plots), we used a linear mixed-effect model with random effects modeled at the plot level to analyze the trends in the rate of biomass change ( $t \text{ ha}^{-1} \text{ year}^{-1}$ ), trends in the rate of mortality biomass change, trends in the change of stand density, trends in the rate of surviving trees' biomass change, the trends in the climatic variables, and the correlations between the rate of biomass change and the explanatory variables. We applied likelihood-ratio tests to determine whether the incorporation of random effects produced a statistically significant improvement in the model fit. If the likelihood-ratio tests indicated that it was not necessary to include random effects, we refitted the models without random effects. We also used a dummy variable with values of either 0 or 1 (an indicator variable) to represent

the province so we could show whether the relationships between rates of biomass change and the explanatory variables varied among the provinces.

### **Trends in the rate of biomass change**

To estimate trends in the rate of biomass change ( $t \text{ ha}^{-1} \text{ year}^{-1}$ ), we modeled this rate as a function of calendar year in the following form:

$$y_{ij} = \beta_0 + \beta_1 \text{year}_{ij} + \gamma_i + \varepsilon_{ij} \quad [1]$$

where  $i$  is the plot number,  $j$  is the  $j$ th census ( $j \neq 1$ ),  $y_{ij}$  is the rate of biomass change ( $t \text{ ha}^{-1} \text{ year}^{-1}$ ) for the  $j$ th census (calculated as the biomass difference between the  $j$ th and  $(j-1)$ th census, divided by the number of years between the two censuses), and  $\text{year}_{ij}$  represents the calendar year of the  $j$ th census. The plot random intercept  $\gamma$  and the random term  $\varepsilon_{ij}$  follow normal distributions. We applied this model separately for the western and eastern regions and for all plots combined. The results were showed in Table 1. The same method was used to estimate the trends of the rate of stand-age corrected biomass change (Table 4).

### **Trends in the rate of mortality biomass change**

We used the same method as in the estimation of aboveground stand biomass to calculate the rate of mortality biomass change ( $t \text{ ha}^{-1} \text{ year}^{-1}$ ). Thus, to estimate the trends in the rate of mortality biomass change ( $t \text{ ha}^{-1} \text{ year}^{-1}$ ), we modeled this rate as a function of calendar year using the linear mixed model in equation [1]. We applied this model separately for western and eastern regions, and the results were showed in Table S4. We found that the rate of mortality biomass change ( $t \text{ ha}^{-1} \text{ year}^{-1}$ ) was all increasing for western and eastern region.

### **Trends in the change of stand density**

To estimate the trends in the change of stand density, we regressed the number living trees (number  $\text{ha}^{-1}$ ) as a function of calendar year using the linear mixed model in equation [1]. The results were showed in Table S5. We found the stand density for both western and eastern regions were decreasing.

### **Trends in the rate of surviving trees' biomass change**

In this study, we also calculated the rate of surviving trees' biomass change by using the same method showed in the estimation of aboveground stand biomass. Here, the surviving trees referred to the trees which living through all census periods. Thus, to estimate the trends in the rate of surviving trees' biomass change ( $t \text{ ha}^{-1} \text{ year}^{-1}$ ), we modeled this rate as a function of

calendar year using the linear mixed model in equation [1]. The results were showed in Table S6. We found the tree growth in western region was decreasing, but it was increasing in eastern region.

### **Relationships between the rate of biomass change and stand age**

It has long been known that aboveground forest productivity declines with age (*S14, S15*). This age-related decline in forest growth may be caused by altered carbon allocation, an imbalance between photosynthesis and respiration, nutrient limitations, and decreased stand leaf area, among other possibilities (*S14, S15*). Because the declines are particularly evident in boreal and cold-temperate forests (*S15*), we regressed the rate of biomass change as a function of stand age to test whether there were noticeable trends. We used the following linear mixed model:

$$\begin{aligned} y_{ijk} &= \alpha_0 + \alpha_1 D_k + \beta_1 age_{ijk} + \beta_2 age_{ijk} D_k + \gamma_i + \varepsilon_{ijk} \\ &= (\alpha_0 + \alpha_1 D_k) + (\beta_1 + \beta_2 D_k) age_{ijk} + \gamma_i + \varepsilon_{ijk} \end{aligned} \quad [2]$$

where  $i$  is the plot number,  $j$  is the  $j$ th census ( $j \neq 1$ ),  $k$  is the  $k$ th province,  $D_k$  is a dummy variable (value of either 1 or 0) for the provinces,  $y_{ijk}$  is the rate of biomass change ( $t \text{ ha}^{-1} \text{ year}^{-1}$ ) for the  $j$ th census (calculated as the biomass difference between the  $j$ th and  $(j-1)$ th census, divided by the number of years between the censuses), and  $age_{ijk}$  represents stand age. The plot random intercept  $\gamma_i$  and the random term  $\varepsilon_{ijk}$  follow normal distributions. In equation [2],  $\alpha_0$  is the overall intercept and  $\alpha_1$  is the intercept adjustment for the provinces, and  $\beta_1$  is the overall slope of stand age and  $\beta_2$  is the slope adjustment for the provinces.

The biomass decreased significantly with increasing stand age for the western region and all combined plots, but there was no significant trend for eastern region (Table S7, Fig. 3(a, b)). None of the estimated  $\beta_2$  parameters was significant. We also tested models with polynomial terms for stand age and random slopes among plots, but found no evidence (either from fixed-effects  $t$ -tests or likelihood-ratio tests) to support these models.

### **Trends in the climatic variables**

To model the trends in the climatic variables, we first extracted the time series for the climatic variables for all plots between the initial and final census years, and then regressed the extracted data sets as a function of calendar year using the linear mixed model in equation [1].

The annual mean temperatures in the western and eastern regions increased significantly (Table S8). The annual precipitation and *CMI* decreased significantly for western region, but increased significantly for eastern region (Table S8). We found that *AMI* increased significantly for western region but not for eastern region (Table S8).

## Relationships between the rate of biomass change and climatic variables

To explore the associations between the rate of biomass change and the climatic variables, we regressed the rate of biomass change as functions of the climatic variables using a model with the following form:

$$\begin{aligned} y_{ijk} &= \alpha_0 + \alpha_1 D_k + \beta_1 x_{ijk} + \beta_2 x_{ijk} D_k + \gamma_i + \varepsilon_{ijk} \\ &= (\alpha_0 + \alpha_1 D_k) + (\beta_1 + \beta_2 D_k) x_{ijk} + \gamma_i + \varepsilon_{ijk} \end{aligned} \quad [3]$$

where  $x_{ijk}$  represents the average annual value of climatic variable for the  $j$ th census of the  $i$ th plot of province  $k$ , which was obtained by averaging the annual climatic variables across all years of the census interval between the  $j$ th and  $(j-1)$ th census, and the other parameters are the same as in equation [2].

For the western region, both the average precipitation and *CMI* were significantly positively correlated with the rate of biomass change ( $\beta_1 + \beta_2 D_k$ ; Table 2). Except for the average temperature in Manitoba, both the average temperature and *AMI* were significantly negatively correlated with the rate of biomass change for the western region ( $\beta_1 + \beta_2 D_k$ ; Table 2). There were no significant correlations between the climatic variables and the rate of biomass change for the eastern region. We also tested models with polynomial terms for the climatic variables and random slopes among plots, but we found no evidence (either from fixed-effects  $t$ -tests or likelihood-ratio tests) to support these models.

To intuitively show these relationships, we prepared scatterplots between the rate of biomass change and the climatic variables for each province in the western region and a single scatterplot for eastern region (Fig. *S4* to *S7*). The trends in the scatterplots were consistent with our model results (Table 2).

## Relationships between the rate of biomass change and the combined effects of climatic variables and stand age

To examine the relationships between the rate of biomass change and the combined effects of climatic variables and stand age, we regressed the rate of biomass change as a function of climatic variables and stand age simultaneously to test for the existence of a significant correlation. Furthermore, to compare the relative importance of the different variables, we applied standardized regressions rather than models using the original variables. Before fitting the regression, we standardized both the response variable and the explanatory variables by subtracting the mean from each value and then dividing the result by the standard deviation. Please note that we standardized the variables for western and eastern regions separately rather

than standardized all the combined data sets. The magnitude of the estimated standardized coefficients can then be used to directly compare the effects of the explanatory variables on the response variable. We used the following form of linear mixed model:

$$\begin{aligned}
 y_{ijk} &= \alpha_0 + \alpha_1 D_k + \beta_1 x_{ijk} + \beta_2 x_{ijk} D_k + \beta_3 age_{ijk} + \beta_4 age_{ijk} D_k + \beta_5 x_{ijk} age_{ijk} + \gamma_i + \varepsilon_{ijk} \\
 &= (\alpha_0 + \alpha_1 D_k) + (\beta_1 + \beta_2 D_k) x_{ijk} + (\beta_3 + \beta_4 D_k) age_{ijk} + \beta_5 x_{ijk} age_{ijk} + \gamma_i + \varepsilon_{ijk} \quad [4]
 \end{aligned}$$

All symbols are the same as defined in equations [2] and [3]. After fitting the data using equation [4], we found that the estimated  $\beta_4$  and  $\beta_5$  coefficients were not significant. Therefore, we can rewrite equation [4] in the following simplified form:

$$y_{ijk} = (\alpha_0 + \alpha_1 D_k) + (\beta_1 + \beta_2 D_k) x_{ijk} + \beta_3 age_{ijk} + \gamma_i + \varepsilon_{ijk} \quad [5]$$

The fitted results were showed in Table 3.

Table S1. Characteristics of the 96 forest plots that met the criteria for inclusion in our analysis.

| Plot ID* | Region | Long. (°W) | Lat. (°N) | Plot size (ha) | EL (m) | Initial stand age (years) | Initial no. live trees | Calendar year of census |       |       |       |       | Species composition§                                               | Biomass Change (t ha <sup>-1</sup> year <sup>-1</sup> ) |
|----------|--------|------------|-----------|----------------|--------|---------------------------|------------------------|-------------------------|-------|-------|-------|-------|--------------------------------------------------------------------|---------------------------------------------------------|
|          |        |            |           |                |        |                           |                        | Year1                   | Year2 | Year3 | Year4 | Year5 |                                                                    |                                                         |
| AB5      | west   | 116.77     | 54.17     | 0.10           | 881    | 135                       | 160                    | 1988                    | 1993  | 2002  |       |       | BS 0.78 LP 0.22                                                    | -0.1462                                                 |
| AB6      | west   | 111.84     | 55.33     | 0.10           | 661    | 83                        | 100                    | 1986                    | 1996  | 2002  |       |       | JP 1.00                                                            | -0.0492                                                 |
| AB7      | west   | 114.39     | 49.38     | 0.10           | 1490   | 104                       | 134                    | 1984                    | 1994  | 2003  |       |       | LP 1.00                                                            | -0.0376                                                 |
| AB8      | west   | 114.15     | 49.34     | 0.10           | 1435   | 86                        | 369                    | 1984                    | 1994  | 2003  |       |       | LP 1.00                                                            | -0.0805                                                 |
| AB9      | west   | 114.47     | 50.18     | 0.10           | 1882   | 117                       | 116                    | 1984                    | 1994  | 2003  |       |       | LP 0.55 ES 0.34 AF 0.11                                            | -0.2339                                                 |
| AB10     | west   | 114.59     | 50.27     | 0.10           | 1903   | 98                        | 199                    | 1984                    | 1994  | 2003  |       |       | LP 0.93 ES 0.03 AF 0.03                                            | 0.0259                                                  |
| AB11     | west   | 114.60     | 50.26     | 0.10           | 2010   | 120                       | 195                    | 1984                    | 1994  | 2002  |       |       | PF 0.97 WP 0.03                                                    | -0.1149                                                 |
| AB12     | west   | 114.60     | 50.25     | 0.10           | 2010   | 118                       | 257                    | 1984                    | 1994  | 2002  |       |       | PF 0.91 AF 0.05 ES 0.03                                            | -0.0491                                                 |
| AB13     | west   | 114.59     | 50.22     | 0.10           | 2010   | 149                       | 146                    | 1984                    | 1994  | 2003  |       |       | LP 0.58 ES 0.25 AF 0.16                                            | -0.1715                                                 |
| AB14     | west   | 114.59     | 50.25     | 0.10           | 2010   | 111                       | 273                    | 1984                    | 1994  | 2003  |       |       | LP 0.92 AF 0.05 ES 0.02                                            | -0.0810                                                 |
| AB15     | west   | 114.57     | 50.29     | 0.10           | 1903   | 129                       | 257                    | 1984                    | 1995  | 2007  |       |       | LP 1.00                                                            | 0.0140                                                  |
| AB16     | west   | 115.05     | 51.45     | 0.10           | 1532   | 97                        | 150                    | 1984                    | 1994  | 2006  |       |       | LP 1.00                                                            | -0.0007                                                 |
| AB17     | west   | 115.67     | 52.40     | 0.82           | 1501   | 90                        | 958                    | 1963                    | 1976  | 1986  | 1998  |       | LP 0.90 WS 0.09 BS 0.01<br>WS 0.47 TA 0.24 BF 0.12 LP 0.11 BP 0.06 | 0.0223                                                  |
| AB18     | west   | 117.62     | 54.51     | 0.40           | 844    | 125                       | 406                    | 1964                    | 1977  | 1987  | 2002  |       | LP 0.68 TA 0.30 WS 0.01 BP 0.01                                    | 0.0363                                                  |
| AB19     | west   | 118.59     | 56.79     | 0.32           | 845    | 136                       | 574                    | 1965                    | 1979  | 1988  | 1993  |       | TA 0.95 WS 0.05<br>WS 0.59 BF 0.17 LP 0.10 WB 0.08 TA 0.06         | -0.1581                                                 |
| AB20     | west   | 119.31     | 56.55     | 0.40           | 815    | 98                        | 533                    | 1965                    | 1979  | 1984  | 1990  |       |                                                                    | -0.3962                                                 |
| AB21     | west   | 118.33     | 57.13     | 0.16           | 747    | 170                       | 447                    | 1966                    | 1978  | 1988  | 1993  |       |                                                                    | -0.4114                                                 |
| AB22     | west   | 114.25     | 55.51     | 0.10           | 746    | 172                       | 275                    | 1983                    | 1988  | 1993  | 2001  |       | BS 0.97 LP 0.03                                                    | -0.0046                                                 |
| AB23     | west   | 114.51     | 50.14     | 0.10           | 1882   | 176                       | 176                    | 1984                    | 1989  | 1994  | 2002  |       | AF 0.43 ES 0.39 LP 0.18                                            | -0.0744                                                 |
| AB24     | west   | 114.50     | 50.15     | 0.10           | 1882   | 203                       | 135                    | 1984                    | 1989  | 1994  | 2002  |       | ES 0.74 AF 0.15 LP 0.11                                            | 0.0064                                                  |
| AB25     | west   | 114.51     | 50.16     | 0.10           | 1882   | 208                       | 155                    | 1984                    | 1989  | 1994  | 2002  |       | LP 0.92 ES 0.07 AF 0.01                                            | 0.0060                                                  |
| AB26     | west   | 114.50     | 50.16     | 0.10           | 1882   | 207                       | 297                    | 1984                    | 1989  | 1994  | 2002  |       | LP 0.98 AF 0.01 ES 0.01                                            | -0.0477                                                 |
| AB27     | west   | 114.55     | 50.20     | 0.10           | 2448   | 212                       | 114                    | 1984                    | 1989  | 1994  | 2002  |       | LP 0.59 ES 0.29 AF 0.11                                            | -0.0300                                                 |
| AB28     | west   | 114.55     | 50.19     | 0.10           | 2448   | 154                       | 154                    | 1984                    | 1989  | 1994  | 2002  |       | AF 0.73 ES 0.25 LP 0.02                                            | 0.0321                                                  |
| AB29     | west   | 115.25     | 53.03     | 0.32           | 929    | 123                       | 466                    | 1963                    | 1976  | 1982  | 1992  | 1998  | TA 0.44 WS 0.42 BP 0.14 LP 0.01                                    | -0.1704                                                 |
| AB30     | west   | 115.45     | 53.28     | 0.16           | 920    | 142                       | 791                    | 1963                    | 1980  | 1986  | 1991  | 1997  | BS 0.98 WS 0.02                                                    | -0.0730                                                 |
| AB31     | west   | 114.82     | 55.14     | 0.32           | 784    | 158                       | 652                    | 1964                    | 1978  | 1984  | 1989  | 1995  | LP 0.75 BS 0.25                                                    | -0.0398                                                 |
| SK1      | west   | 105.70     | 54.09     | 0.08           | 1696   | 92                        | 262                    | 1970                    | 1979  | 1996  |       |       | BS 0.85 WS 0.12 BP 0.03                                            | -0.1852                                                 |
| SK2      | west   | 105.38     | 53.80     | 0.08           | 1091   | 104                       | 180                    | 1970                    | 1979  | 1996  |       |       | BS 0.89 BP 0.07 WS 0.04                                            | -0.3226                                                 |
| SK3      | west   | 107.27     | 54.52     | 0.08           | 829    | 100                       | 236                    | 1970                    | 1980  | 1992  |       |       | BS 0.67 WS 0.18 TA 0.13 BP 0.02                                    | -0.2365                                                 |
| SK4      | west   | 105.95     | 54.12     | 0.08           | 662    | 84                        | 217                    | 1971                    | 1979  | 1996  |       |       | BS 0.87 BP 0.11 WS 0.02                                            | -0.1940                                                 |
| SK5      | west   | 104.27     | 54.48     | 0.08           | 1831   | 133                       | 104                    | 1971                    | 1980  | 1996  |       |       | BS 0.87 BP 0.07 JP 0.06                                            | -0.1754                                                 |
| SK10     | west   | 105.24     | 54.46     | 0.06           | 2025   | 86                        | 175                    | 1981                    | 1992  | 1999  |       |       | BS 0.88 BF 0.07 WS 0.02 TA 0.01 WB 0.01                            | -0.2773                                                 |
| SK11     | west   | 107.73     | 55.97     | 0.08           | 1958   | 86                        | 173                    | 1967                    | 1979  | 1996  |       |       | WS 0.82 TA 0.14 BP 0.05                                            | -0.0965                                                 |



|      |      |        |       |      |      |     |     |      |      |      |      |      |  |                                                    |         |
|------|------|--------|-------|------|------|-----|-----|------|------|------|------|------|--|----------------------------------------------------|---------|
| SK12 | west | 107.88 | 54.79 | 0.08 | 1700 | 88  | 139 | 1967 | 1979 | 1996 |      |      |  | WS 0.97 BP 0.03                                    | -0.1195 |
| SK13 | west | 107.27 | 55.07 | 0.08 | 2130 | 97  | 100 | 1967 | 1979 | 1996 |      |      |  | WS 0.78 TA 0.13 BS 0.07 BP 0.02                    | -0.1414 |
| SK14 | west | 108.86 | 55.09 | 0.08 | 1692 | 108 | 107 | 1967 | 1979 | 1996 |      |      |  | WS 0.93 TA 0.05 BP 0.02                            | -0.1233 |
| SK15 | west | 104.92 | 55.36 | 0.08 | 1085 | 82  | 194 | 1969 | 1980 | 1991 |      |      |  | TA 0.73 WS 0.26 BS 0.01                            | -0.1476 |
| SK16 | west | 105.48 | 54.05 | 0.08 | 1353 | 88  | 123 | 1980 | 1991 | 1994 |      |      |  | WS 0.54 TA 0.45 BP 0.01                            | -2.1428 |
| SK17 | west | 105.26 | 54.44 | 0.08 | 790  | 129 | 202 | 1981 | 1992 | 1999 |      |      |  | WS 0.51 BP 0.19 BF 0.19 BS 0.05 WB<br>0.04 TA 0.01 | -0.0175 |
| SK18 | west | 105.24 | 54.45 | 0.08 | 790  | 96  | 167 | 1981 | 1992 | 1999 |      |      |  | WS 0.72 BF 0.13 WB 0.07 BP 0.06 BS<br>0.02         | -0.1556 |
| SK19 | west | 108.26 | 54.97 | 0.08 | 1518 | 92  | 140 | 1966 | 1973 | 1979 | 1998 |      |  | WS 0.61 BP 0.37 BS 0.03                            | -0.0888 |
| SK20 | west | 108.42 | 54.97 | 0.08 | 904  | 147 | 93  | 1966 | 1973 | 1979 | 1998 |      |  | WS 0.63 TA 0.30 BP 0.07                            | -0.0653 |
| SK21 | west | 107.88 | 54.79 | 0.08 | 1700 | 117 | 140 | 1966 | 1974 | 1979 | 1996 |      |  | WS 0.67 TA 0.23 BP 0.10                            | -0.0301 |
| SK22 | west | 108.86 | 55.09 | 0.08 | 1692 | 102 | 88  | 1966 | 1973 | 1979 | 1996 |      |  | WS 0.65 TA 0.31 BS 0.05                            | -0.0881 |
| SK23 | west | 108.35 | 53.62 | 0.08 | 2609 | 106 | 89  | 1966 | 1974 | 1979 | 1999 |      |  | TA 0.58 BS 0.32 WS 0.11                            | -0.0479 |
| SK24 | west | 107.07 | 54.48 | 0.08 | 827  | 98  | 104 | 1966 | 1974 | 1979 | 1999 |      |  | TA 0.60 WS 0.36 BS 0.04                            | -0.0331 |
| SK25 | west | 102.68 | 53.13 | 0.08 | 1392 | 127 | 100 | 1966 | 1974 | 1979 | 1996 |      |  | WS 0.63 TA 0.29 JP 0.07 BS 0.01                    | 0.0021  |
| SK26 | west | 102.64 | 53.03 | 0.08 | 1626 | 82  | 158 | 1969 | 1974 | 1979 | 1998 |      |  | TA 0.57 WS 0.42 BF 0.01                            | -0.0885 |
| SK27 | west | 106.47 | 54.54 | 0.08 | 1582 | 84  | 121 | 1966 | 1974 | 1979 | 1998 |      |  | TA 0.55 WS 0.45                                    | -0.1122 |
| SK28 | west | 106.47 | 54.54 | 0.08 | 1582 | 80  | 123 | 1969 | 1974 | 1979 | 1998 |      |  | TA 0.68 WS 0.32                                    | -0.0512 |
| SK29 | west | 108.35 | 53.62 | 0.08 | 2609 | 95  | 162 | 1966 | 1974 | 1979 | 1998 |      |  | WS 0.45 TA 0.43 BF 0.10 BS 0.02                    | -0.0667 |
| SK30 | west | 107.77 | 54.23 | 0.08 | 1245 | 82  | 91  | 1966 | 1974 | 1980 | 1996 |      |  | WS 0.65 TA 0.34 BP 0.01                            | -0.1052 |
| SK31 | west | 105.72 | 53.97 | 0.08 | 1044 | 112 | 134 | 1968 | 1979 | 1984 | 1998 |      |  | JP 0.89 BS 0.11                                    | -0.0125 |
| MB1  | west | 100.86 | 51.59 | 0.05 | 680  | 121 | 399 | 1994 | 1999 | 2004 |      |      |  | BS 0.91 LP 0.09                                    | 0.0204  |
| MB2  | west | 96.14  | 49.69 | 0.05 | 492  | 80  | 234 | 1986 | 1991 | 1996 | 2001 | 2006 |  | CE 0.95 WS 0.04 LP 0.01                            | -0.5525 |
| MB3  | west | 96.04  | 49.28 | 0.05 | 488  | 80  | 285 | 1986 | 1991 | 1996 | 2001 | 2006 |  | BS 0.93 JP 0.06 LP 0.01                            | -0.0896 |
| MB4  | west | 95.52  | 50.02 | 0.05 | 426  | 107 | 430 | 1989 | 1994 | 1999 | 2004 |      |  | BS 0.71 WS 0.13 BP 0.05 TA 0.05 JP<br>0.04 WS 0.03 | -0.5502 |
| MB5  | west | 95.79  | 51.66 | 0.05 | 366  | 83  | 85  | 1988 | 1993 | 1998 | 2003 | 2008 |  | JP 0.98 BS 0.01 BF 0.01                            | -0.0515 |
| MB6  | west | 95.82  | 51.06 | 0.05 | 394  | 150 | 181 | 1988 | 1993 | 1998 | 2003 | 2008 |  | BS 0.84 LP 0.11 BF 0.05                            | 0.0403  |
| MB7  | west | 95.47  | 51.02 | 0.05 | 397  | 152 | 258 | 1988 | 1993 | 1998 | 2003 | 2008 |  | BS 0.99 LP 0.01                                    | -0.1084 |
| MB8  | west | 97.40  | 51.73 | 0.05 | 219  | 85  | 156 | 1994 | 1999 | 2004 |      |      |  | BS 1.00                                            | -0.0740 |
| MB9  | west | 97.38  | 51.75 | 0.05 | 220  | 83  | 91  | 1994 | 1999 | 2004 |      |      |  | BS 0.99 LP 0.01                                    | -0.1529 |
| MB10 | west | 98.96  | 52.77 | 0.05 | 247  | 80  | 114 | 1990 | 1995 | 2000 | 2005 |      |  | TA 1.00                                            | -0.0904 |
| MB11 | west | 99.12  | 52.89 | 0.05 | 275  | 133 | 200 | 1990 | 1995 | 2000 | 2005 |      |  | BS 0.98 LP 0.02                                    | -0.0046 |
| MB12 | west | 99.19  | 52.91 | 0.05 | 275  | 89  | 183 | 1990 | 1995 | 2000 | 2005 |      |  | JP 0.57 BS 0.43                                    | -0.2436 |
| MB13 | west | 101.09 | 53.36 | 0.05 | 285  | 103 | 483 | 1989 | 1994 | 2002 | 2007 |      |  | BS 0.93 BP 0.06 WS 0.01                            | -0.0852 |
| MB14 | west | 100.27 | 53.88 | 0.05 | 255  | 97  | 196 | 1989 | 1994 | 2002 | 2007 |      |  | BS 0.82 WS 0.14 TA 0.04                            | -0.1218 |
| MB15 | west | 101.26 | 54.16 | 0.05 | 334  | 95  | 323 | 1989 | 1994 | 2002 | 2007 |      |  | JP 0.69 BS 0.30 WS 0.02                            | -0.0115 |
| MB16 | west | 101.32 | 54.08 | 0.05 | 273  | 112 | 534 | 1989 | 1994 | 2002 | 2007 |      |  | BS 0.99 WB 0.01                                    | -0.0216 |
| ON1  | east | 93.64  | 50.72 | 0.12 | 349  | 86  | 132 | 1993 | 1998 | 2006 |      |      |  | TA 0.72 JP 0.12 WS 0.08 BF 0.05 BS                 | -0.0248 |

|      |      |       |       |      |     |     |     |      |      |      | 0.04 |                                                                       |         |
|------|------|-------|-------|------|-----|-----|-----|------|------|------|------|-----------------------------------------------------------------------|---------|
| ON2  | east | 86.96 | 49.75 | 0.12 | 347 | 122 | 198 | 1993 | 2000 | 2004 |      | JP 0.58 BS 0.41 TA 0.01                                               | 0.6531  |
| ON3  | east | 84.08 | 49.42 | 0.12 | 275 | 111 | 100 | 1993 | 1997 | 2004 |      | JP 0.70 BS 0.22 BF 0.05 WS 0.03<br>TA 0.36 BP 0.33 WS 0.13 WB 0.11 BF | -0.0351 |
| ON4  | east | 83.07 | 49.11 | 0.12 | 267 | 92  | 135 | 1993 | 2000 | 2006 |      | 0.07                                                                  | 1.1679  |
| ON5  | east | 80.28 | 48.53 | 0.12 | 316 | 85  | 109 | 1994 | 1999 | 2006 |      | TA 0.59 BP 0.41                                                       | -0.6913 |
| ON6  | east | 90.49 | 50.31 | 0.12 | 101 | 153 | 278 | 1993 | 1998 | 2004 |      | JP 0.61 BS 0.35 TA 0.02 WB 0.02                                       | 0.4342  |
| ON7  | east | 89.37 | 48.72 | 0.12 | 306 | 96  | 179 | 1992 | 1997 | 2006 |      | BS 0.79 TA 0.17 BF 0.03 BP 0.01                                       | 0.0349  |
| ON8  | east | 89.89 | 48.17 | 0.12 | 426 | 81  | 202 | 1992 | 1997 | 2004 |      | JP 0.90 BF 0.09 BS 0.01                                               | 0.0398  |
| ON9  | east | 90.61 | 48.61 | 0.12 | 395 | 97  | 191 | 1992 | 2001 | 2004 |      | JP 0.85 WB 0.09 TA 0.06 BS 0.01<br>JP 0.79 BS 0.10 BF 0.05 WB 0.04 TA | -0.8195 |
| ON10 | east | 81.27 | 48.46 | 0.12 | 305 | 88  | 234 | 1993 | 1998 | 2004 |      | 0.02                                                                  | 0.1699  |
| QC1  | east | 78.34 | 50.24 | 0.04 | 266 | 173 | 90  | 1974 | 1980 | 1991 | 1998 | BS 0.53 BF 0.41 WB 0.06                                               | -0.1072 |
| QC2  | east | 77.11 | 51.02 | 0.04 | 255 | 101 | 85  | 1972 | 1979 | 1990 | 1999 | BS 0.99 BF 0.01                                                       | -0.0442 |
| QC3  | east | 77.88 | 50.66 | 0.04 | 247 | 113 | 89  | 1972 | 1979 | 1990 | 1999 | BS 0.98 BF 0.02                                                       | -0.0633 |
| QC4  | east | 77.95 | 50.21 | 0.04 | 244 | 113 | 89  | 1972 | 1979 | 1990 | 1999 | BS 0.98 BF 0.02                                                       | 0.0288  |
| QC5  | east | 74.01 | 50.96 | 0.04 | 394 | 90  | 85  | 1971 | 1979 | 1990 | 1999 | BS 0.91 WB 0.09                                                       | 0.0536  |
| QC6  | east | 73.38 | 50.04 | 0.04 | 394 | 103 | 93  | 1971 | 1979 | 1992 |      | BS 1.00                                                               | 0.0274  |
| QC7  | east | 73.96 | 49.03 | 0.04 | 427 | 92  | 89  | 1971 | 1979 | 1992 |      | BS 1.00                                                               | 0.1101  |
| QC9  | east | 75.10 | 48.83 | 0.04 | 452 | 87  | 84  | 1973 | 1980 | 1992 |      | BS 1.00                                                               | 0.0811  |
| QC10 | east | 71.96 | 50.93 | 0.04 | 590 | 120 | 83  | 1975 | 1980 | 1995 |      | BS 0.99 BF 0.01                                                       | 0.0726  |
| QC11 | east | 69.80 | 49.63 | 0.04 | 543 | 96  | 99  | 1976 | 1987 | 1998 |      | BS 0.99 BF 0.01                                                       | -0.0533 |
| QC12 | east | 66.03 | 51.53 | 0.04 | 667 | 218 | 80  | 1977 | 1989 | 2001 |      | BS 0.59 BF 0.41                                                       | 0.1103  |
| QC13 | east | 66.38 | 52.06 | 0.04 | 646 | 164 | 81  | 1977 | 1989 | 2001 |      | BS 0.75 BF 0.25                                                       | -0.0418 |
| QC14 | east | 66.98 | 51.19 | 0.04 | 487 | 166 | 84  | 1977 | 1989 | 2001 |      | BS 0.97 BF 0.03                                                       | 0.0156  |
| QC15 | east | 65.94 | 50.33 | 0.04 | 59  | 98  | 92  | 1977 | 1989 | 1999 |      | BF 0.66 WB 0.29 WS 0.03 BS 0.01                                       | -0.0297 |
| QC16 | east | 66.50 | 51.01 | 0.04 | 675 | 143 | 91  | 1977 | 1989 | 2001 |      | BF 0.58 BS 0.42                                                       | -0.1048 |
| QC17 | east | 66.41 | 51.09 | 0.04 | 562 | 143 | 89  | 1977 | 1989 | 2001 |      | BS 0.69 BF 0.31                                                       | -0.0088 |

\* AB = Alberta, SK = Saskatchewan, MB = Manitoba, ON = Ontario, and QC = Quebec.

§ Species composition of the stand at the time of the initial census. Values represent the proportion of the basal areas of each species and may not add to 1 due to rounding. AF = alpine fir (*Abies lasiocarpa*), BF = balsam fir (*Abies balsamifera*), BP = balsam poplar (*Populus balsamifera*), BS = black spruce (*Picea mariana*), CE=cedars (*Genus cedrus*), ES = Engelmann spruce (*Picea engelmanni*), JP = jack pine (*Pinus banksiana*), LP = lodgepole pine (*Pinus contorta*), PF = limber pine (*Pinus flexilis*), TA = trembling aspen (*Populus tremuloides*), WB = white birch (*Betula papyrifera*), WP=eastern white pine (*Pinus strobus*), WS = white spruce (*Picea glauca*).

Table S2. Aboveground biomass (t/ha) for the 96 forest plots in our analysis.

| Plot ID* | Region | Long. (°W) | Lat. (°N) | Aboveground biomass(t/ha) of calendar year of census |        |        |        |        |
|----------|--------|------------|-----------|------------------------------------------------------|--------|--------|--------|--------|
|          |        |            |           | Year1                                                | Year2  | Year3  | Year4  | Year5  |
| AB5      | west   | 116.77     | 54.17     | 155.06                                               | 153.28 | 138.22 |        |        |
| AB6      | west   | 111.84     | 55.33     | 119.06                                               | 125.2  | 127.11 |        |        |
| AB7      | west   | 114.39     | 49.38     | 68.14                                                | 80.82  | 88.55  |        |        |
| AB8      | west   | 114.15     | 49.34     | 196.64                                               | 192.85 | 182.92 |        |        |
| AB9      | west   | 114.47     | 50.18     | 154.75                                               | 163.65 | 152.72 |        |        |
| AB10     | west   | 114.59     | 50.27     | 123.00                                               | 131.52 | 141.29 |        |        |
| AB11     | west   | 114.60     | 50.26     | 123.61                                               | 130.15 | 128.03 |        |        |
| AB12     | west   | 114.60     | 50.25     | 105.58                                               | 115.82 | 120.86 |        |        |
| AB13     | west   | 114.59     | 50.22     | 204.17                                               | 216.52 | 213.74 |        |        |
| AB14     | west   | 114.59     | 50.25     | 106.24                                               | 117.22 | 120.54 |        |        |
| AB15     | west   | 114.57     | 50.29     | 79.89                                                | 97.63  | 119.02 |        |        |
| AB16     | west   | 115.05     | 51.45     | 129.07                                               | 140.49 | 154.1  |        |        |
| AB17     | west   | 115.67     | 52.40     | 73.85                                                | 76.81  | 86.85  | 95.87  |        |
| AB18     | west   | 117.62     | 54.51     | 248.81                                               | 245.21 | 207.95 | 210.25 |        |
| AB19     | west   | 118.59     | 56.79     | 182.12                                               | 183.61 | 186.22 | 182.22 |        |
| AB20     | west   | 119.31     | 56.55     | 112.59                                               | 145.89 | 145.57 | 131.41 |        |
| AB21     | west   | 118.33     | 57.13     | 179.63                                               | 197.83 | 198.34 | 171.75 |        |
| AB22     | west   | 114.25     | 55.51     | 141.03                                               | 140.85 | 128.84 | 125.4  |        |
| AB23     | west   | 114.51     | 50.14     | 175.3                                                | 185.41 | 171.92 | 175.39 |        |
| AB24     | west   | 114.50     | 50.15     | 165.76                                               | 167.2  | 166.41 | 168.83 |        |
| AB25     | west   | 114.51     | 50.16     | 167.06                                               | 166.33 | 168.55 | 168.66 |        |
| AB26     | west   | 114.50     | 50.16     | 148.27                                               | 153.36 | 156.17 | 159.11 |        |
| AB27     | west   | 114.55     | 50.20     | 184.1                                                | 187.57 | 166.29 | 163.25 |        |
| AB28     | west   | 114.55     | 50.19     | 172.39                                               | 178.63 | 188.01 | 201.87 |        |
| AB29     | west   | 115.25     | 53.03     | 242.19                                               | 268.93 | 267.63 | 230.16 | 224.99 |
| AB30     | west   | 115.45     | 53.28     | 141.16                                               | 167.78 | 171.82 | 165.16 | 170.00 |
| AB31     | west   | 114.82     | 55.14     | 216.82                                               | 222.63 | 222.17 | 207.45 | 210.59 |
| SK1      | west   | 105.70     | 54.09     | 148.25                                               | 180.57 | 188.08 |        |        |
| SK2      | west   | 105.38     | 53.80     | 74.39                                                | 124.75 | 126.66 |        |        |
| SK3      | west   | 107.27     | 54.52     | 147.52                                               | 184.75 | 195.37 |        |        |
| SK4      | west   | 105.95     | 54.12     | 42.62                                                | 77.30  | 94.93  |        |        |
| SK5      | west   | 104.27     | 54.48     | 41.47                                                | 73.40  | 85.26  |        |        |
| SK10     | west   | 105.24     | 54.46     | 126.88                                               | 131.16 | 120.29 |        |        |
| SK11     | west   | 107.73     | 55.97     | 141.64                                               | 169.41 | 180.86 |        |        |
| SK12     | west   | 107.88     | 54.79     | 114.77                                               | 149.94 | 165.22 |        |        |
| SK13     | west   | 107.27     | 55.07     | 141.09                                               | 170.45 | 171.17 |        |        |
| SK14     | west   | 108.86     | 55.09     | 155.99                                               | 175.94 | 168.58 |        |        |
| SK15     | west   | 104.92     | 55.36     | 136.18                                               | 154.17 | 154.29 |        |        |
| SK16     | west   | 105.48     | 54.05     | 200.13                                               | 211.83 | 195.73 |        |        |
| SK17     | west   | 105.26     | 54.44     | 176.50                                               | 182.32 | 185.16 |        |        |
| SK18     | west   | 105.24     | 54.45     | 165.47                                               | 174.96 | 173.37 |        |        |
| SK19     | west   | 108.26     | 54.97     | 143.87                                               | 163.58 | 173.99 | 182.23 |        |
| SK20     | west   | 108.42     | 54.97     | 167.49                                               | 184.84 | 193.88 | 206.72 |        |
| SK21     | west   | 107.88     | 54.79     | 148.34                                               | 147.67 | 150.55 | 142.09 |        |
| SK22     | west   | 108.86     | 55.09     | 162.33                                               | 178.4  | 189.22 | 193.96 |        |
| SK23     | west   | 108.35     | 53.62     | 162.12                                               | 179.85 | 194.35 | 220.87 |        |
| SK24     | west   | 107.07     | 54.48     | 155.62                                               | 161.14 | 179.12 | 196.86 |        |
| SK25     | west   | 102.68     | 53.13     | 166.99                                               | 177.35 | 177.91 | 194.06 |        |

|      |      |        |       |        |        |        |        |        |
|------|------|--------|-------|--------|--------|--------|--------|--------|
| SK26 | west | 102.64 | 53.03 | 149.51 | 163.62 | 176.03 | 189.93 |        |
| SK27 | west | 106.47 | 54.54 | 177.13 | 206.65 | 214.38 | 223.53 |        |
| SK28 | west | 106.47 | 54.54 | 156.46 | 168.73 | 166.26 | 172.88 |        |
| SK29 | west | 108.35 | 53.62 | 172.73 | 194.01 | 200.02 | 213.06 |        |
| SK30 | west | 107.77 | 54.23 | 117.30 | 131.66 | 126.82 | 110.21 |        |
| SK31 | west | 105.72 | 53.97 | 163.11 | 168.74 | 176.42 | 184.41 |        |
| MB1  | west | 100.86 | 51.59 | 82.40  | 86.33  | 90.78  |        |        |
| MB2  | west | 96.14  | 49.69 | 150.17 | 172.37 | 203.52 | 225.34 | 204.62 |
| MB3  | west | 96.04  | 49.28 | 138.87 | 143.39 | 156.64 | 166.44 | 164.64 |
| MB4  | west | 95.52  | 50.02 | 188.00 | 202.31 | 214.41 | 201.20 |        |
| MB5  | west | 95.79  | 51.66 | 91.56  | 100.74 | 103.21 | 107.95 | 105.24 |
| MB6  | west | 95.82  | 51.06 | 68.66  | 68.75  | 70.82  | 70.34  | 74.64  |
| MB7  | west | 95.47  | 51.02 | 124.58 | 126.92 | 129.48 | 127.31 | 122.2  |
| MB8  | west | 97.40  | 51.73 | 126.62 | 131.53 | 134.59 |        |        |
| MB9  | west | 97.38  | 51.75 | 125.73 | 136.60 | 143.64 |        |        |
| MB10 | west | 98.96  | 52.77 | 152.52 | 153.46 | 165.97 | 162.39 |        |
| MB11 | west | 99.12  | 52.89 | 64.30  | 65.13  | 67.92  | 68.53  |        |
| MB12 | west | 99.19  | 52.91 | 75.74  | 78.32  | 84.70  | 75.10  |        |
| MB13 | west | 101.09 | 53.36 | 109.21 | 111.69 | 120.9  | 116.73 |        |
| MB14 | west | 100.27 | 53.88 | 151.63 | 157.33 | 164.67 | 161.83 |        |
| MB15 | west | 101.26 | 54.16 | 60.95  | 61.69  | 63.76  | 63.58  |        |
| MB16 | west | 101.32 | 54.08 | 64.4   | 61.10  | 54.72  | 49.99  |        |
| ON1  | east | 93.64  | 50.72 | 104.08 | 113.95 | 128.16 |        |        |
| ON2  | east | 86.96  | 49.75 | 152.39 | 138.52 | 141.04 |        |        |
| ON3  | east | 84.08  | 49.42 | 93.51  | 97.11  | 101.71 |        |        |
| ON4  | east | 83.07  | 49.11 | 180.84 | 146.23 | 158.61 |        |        |
| ON5  | east | 80.28  | 48.53 | 118.77 | 129.65 | 111.00 |        |        |
| ON6  | east | 90.49  | 50.31 | 148.97 | 141.30 | 147.73 |        |        |
| ON7  | east | 89.37  | 48.72 | 73.04  | 71.05  | 70.31  |        |        |
| ON8  | east | 89.89  | 48.17 | 99.81  | 101.50 | 105.81 |        |        |
| ON9  | east | 90.61  | 48.61 | 140.36 | 134.22 | 124.8  |        |        |
| ON10 | east | 81.27  | 48.46 | 164.59 | 163.36 | 167.99 |        |        |
| QC1  | east | 78.34  | 50.24 | 152.32 | 187.25 | 161.90 | 156.59 |        |
| QC2  | east | 77.11  | 51.02 | 101.22 | 106.57 | 120.07 | 127.54 |        |
| QC3  | east | 77.88  | 50.66 | 127.06 | 123.24 | 124.37 | 107.24 |        |
| QC4  | east | 77.95  | 50.21 | 118.77 | 109.56 | 117.21 | 109.50 |        |
| QC5  | east | 74.01  | 50.96 | 94.52  | 86.23  | 95.92  | 95.40  |        |
| QC6  | east | 73.38  | 50.04 | 112.62 | 115.10 | 123.77 |        |        |
| QC7  | east | 73.96  | 49.03 | 145.29 | 141.53 | 154.02 |        |        |
| QC9  | east | 75.10  | 48.83 | 160.18 | 155.62 | 159.49 |        |        |
| QC10 | east | 71.96  | 50.93 | 115.44 | 112.89 | 121.58 |        |        |
| QC11 | east | 69.80  | 49.63 | 171.04 | 186.02 | 194.54 |        |        |
| QC12 | east | 66.03  | 51.53 | 102.74 | 99.62  | 112.39 |        |        |
| QC13 | east | 66.38  | 52.06 | 82.93  | 96.78  | 104.62 |        |        |
| QC14 | east | 66.98  | 51.19 | 119.58 | 119.40 | 121.45 |        |        |
| QC15 | east | 65.94  | 50.33 | 131.08 | 138.71 | 141.51 |        |        |
| QC16 | east | 66.50  | 51.01 | 154.75 | 178.26 | 186.67 |        |        |
| QC17 | east | 66.41  | 51.09 | 114.94 | 124.84 | 133.47 |        |        |

\* AB = Alberta, SK = Saskatchewan, MB = Manitoba, ON = Ontario, and QC = Quebec.

Table S3. The downloaded climatic variables for plots with census years after 2003.

| Plot | Year      | Climate station name   | Climate station locations |          |
|------|-----------|------------------------|---------------------------|----------|
|      |           |                        | Longitude                 | Latitude |
| AB15 | 2004-2007 | LOST CREEK SOUTH       | 114.70                    | 50.17    |
| AB16 | 2004-2006 | BLUEHILL LO            | 115.13                    | 51.70    |
| MB1  | 2004      | PINE RIVER             | 100.57                    | 51.80    |
| MB2  | 2004-2006 | OSTENFELD              | 96.48                     | 49.82    |
| MB3  | 2004-2006 | PINEY                  | 96.01                     | 49.03    |
| MB4  | 2004      | RENNIE                 | 95.53                     | 49.85    |
| MB5  | 2004-2008 | GREAT FALLS CLIMATE    | 95.98                     | 50.52    |
| MB6  | 2004-2008 | GREAT FALLS CLIMATE    | 95.98                     | 50.52    |
| MB7  | 2004-2008 | GREAT FALLS CLIMATE    | 95.98                     | 50.52    |
| MB8  | 2004      | HODGSON 2              | 97.47                     | 51.19    |
| MB9  | 2004      | HODGSON 2              | 97.47                     | 51.19    |
| MB10 | 2004-2005 | GRAND RAPIDS HYDRO     | 99.28                     | 53.16    |
| MB11 | 2004-2005 | GRAND RAPIDS HYDRO     | 99.28                     | 53.16    |
| MB12 | 2004-2005 | GRAND RAPIDS HYDRO     | 99.28                     | 53.16    |
| MB13 | 2004-2007 | THE PAS A              | 101.10                    | 53.97    |
| MB14 | 2004-2007 | THE PAS A              | 101.10                    | 53.97    |
| MB15 | 2004-2007 | THE PAS A              | 101.10                    | 53.97    |
| MB16 | 2004-2007 | THE PAS A              | 101.10                    | 53.97    |
| ON1  | 2004-2006 | EAR FALLS (AUT)        | 93.22                     | 50.63    |
| ON2  | 2004      | GERALDTON A            | 86.93                     | 49.78    |
| ON3  | 2004      | NAGAGAMI (AUT)         | 84.16                     | 49.75    |
| ON4  | 2004-2006 | KAPUSKASING A          | 82.47                     | 49.41    |
| ON5  | 2004-2006 | KIRKLAND LAKE CS       | 80.00                     | 48.15    |
| ON6  | 2004      | SIOUX LOOKOUT A        | 91.90                     | 50.12    |
| ON7  | 2004-2006 | THUNDER BAY A          | 89.33                     | 48.37    |
| ON8  | 2004      | WHITEFISH LAKE         | 89.92                     | 48.28    |
| ON9  | 2004      | UPSALA (AUT)           | 90.47                     | 49.03    |
| ON10 | 2004      | TIMMINS VICTOR POWER A | 81.38                     | 48.57    |

Table S4. Fixed effects of the linear mixed models describing trends in the rate of mortality biomass change ( $t \text{ ha}^{-1} \text{ year}^{-1}$ ).  $\beta$  is the slope and represents the annual rate of change in mortality biomass,  $n$  is the number of forest plots used in the model, and  $P$  is the significance level for the model's fixed effects based on a t-test.

| <b>Data</b> | <b>Parameter</b> | <b><math>\beta</math></b> | <b>Std. error</b> | <b><math>P</math></b> | <b><math>n</math></b> |
|-------------|------------------|---------------------------|-------------------|-----------------------|-----------------------|
| Western     | Year             | 0.0289                    | 0.0095            | 0.0028                | 70                    |
| Eastern     | Year             | 0.0588                    | 0.0274            | 0.0406                | 26                    |

Table S5. Fixed effects of the linear mixed models describing trends in the density change (number  $\text{ha}^{-1}$ ).  $\beta$  is the slope and represents the annual rate of change in density,  $n$  is the number of forest plots used in the model, and  $P$  is the significance level for the model's fixed effects based on a t-test.

| <b>Data</b> | <b>Parameter</b> | <b><math>\beta</math></b> | <b>Std. error</b> | <b><math>P</math></b> | <b><math>n</math></b> |
|-------------|------------------|---------------------------|-------------------|-----------------------|-----------------------|
| Western     | Year             | -25.624                   | 5.1950            | <0.0001               | 70                    |
| Eastern     | Year             | -7.571                    | 2.8100            | <0.0001               | 26                    |

Table S6. Fixed effects of the linear mixed models describing trends in the rate of surviving trees' biomass change ( $t \text{ ha}^{-1} \text{ year}^{-1}$ ).  $\beta$  is the slope and represents the annual rate of change in surviving biomass,  $n$  is the number of forest plots used in the model, and  $P$  is the significance level for the model's fixed effects based on a t-test.

| <b>Data</b> | <b>Parameter</b> | <b><math>\beta</math></b> | <b>Std. error</b> | <b><math>P</math></b> | <b><math>n</math></b> |
|-------------|------------------|---------------------------|-------------------|-----------------------|-----------------------|
| Western     | Year             | -0.0116                   | 0.0056            | <0.0394               | 70                    |
| Eastern     | Year             | 0.0441                    | 0.0098            | <0.0001               | 26                    |

Table S7. Fixed effects of linear mixed models (equation 2) describing the relationships between the rate of biomass change and stand age.  $\beta$  is the estimated slope of the model and reflects the rate of biomass change as a function of stand age,  $n$  is the number of forest plots used in the model, and  $P$  is the significance level for the model's fixed effects based on a  $t$ -test. To simplify, we have only shown the estimated  $\beta_1$  parameters and the significant  $\beta_2$  parameters, but none of  $\beta_2$  parameters were significant.

| <b>Data</b>    | <b>Parameter</b> | <b><math>\beta</math></b> | <b>Std. error</b> | <b><math>P</math></b> | <b><math>n</math></b> |
|----------------|------------------|---------------------------|-------------------|-----------------------|-----------------------|
| All plots      | Stand age        | -0.0091                   | 0.0027            | 0.0018                | 96                    |
| Western region | Stand age        | -0.0120                   | 0.0039            | 0.0005                | 70                    |
| Eastern region | Stand age        | 0.0009                    | 0.0052            | 0.8465                | 26                    |

Table S8. Fixed effects of the linear mixed models (equation 1) describing trends in the climatic variables.  $\beta$  is the slope and represents the annual change in the climatic variable,  $n$  is the number of forest plots used in the model, and  $P$  is the significance level for the model's fixed effects based on a  $t$ -test. According to the results, the mean cumulative changes in temperature and precipitation are 2.0205 ( $^{\circ}\text{C}$ ) and -46.51 mm for western region from 1963 to 2008, respectively. The mean cumulative changes in temperature and precipitation are 1.4140 ( $^{\circ}\text{C}$ ) and 84.70 mm for eastern region from 1971 to 2006, respectively.

| <b>Data</b>    | <b>Model</b>        | <b><math>\beta</math></b> | <b>Std. Error</b> | <b><math>P</math></b> | <b><math>n</math></b> |
|----------------|---------------------|---------------------------|-------------------|-----------------------|-----------------------|
| Western region | Temperature trend   | 0.0449                    | 0.0034            | <0.0001               | 70                    |
|                | Precipitation trend | -1.0337                   | 0.2757            | 0.0002                | 70                    |
|                | <i>CMI</i> trend    | -0.1791                   | 0.0331            | <0.0001               | 70                    |
|                | <i>AMI</i> trend    | 4.5310                    | 0.5946            | <0.0001               | 70                    |
| Eastern region | Temperature trend   | 0.0404                    | 0.0067            | <0.0001               | 26                    |
|                | Precipitation trend | 2.4201                    | 0.5743            | <0.0001               | 26                    |
|                | <i>CMI</i> trend    | 0.1435                    | 0.0613            | 0.0197                | 26                    |
|                | <i>AMI</i> trend    | 0.6725                    | 0.4019            | 0.0949                | 26                    |

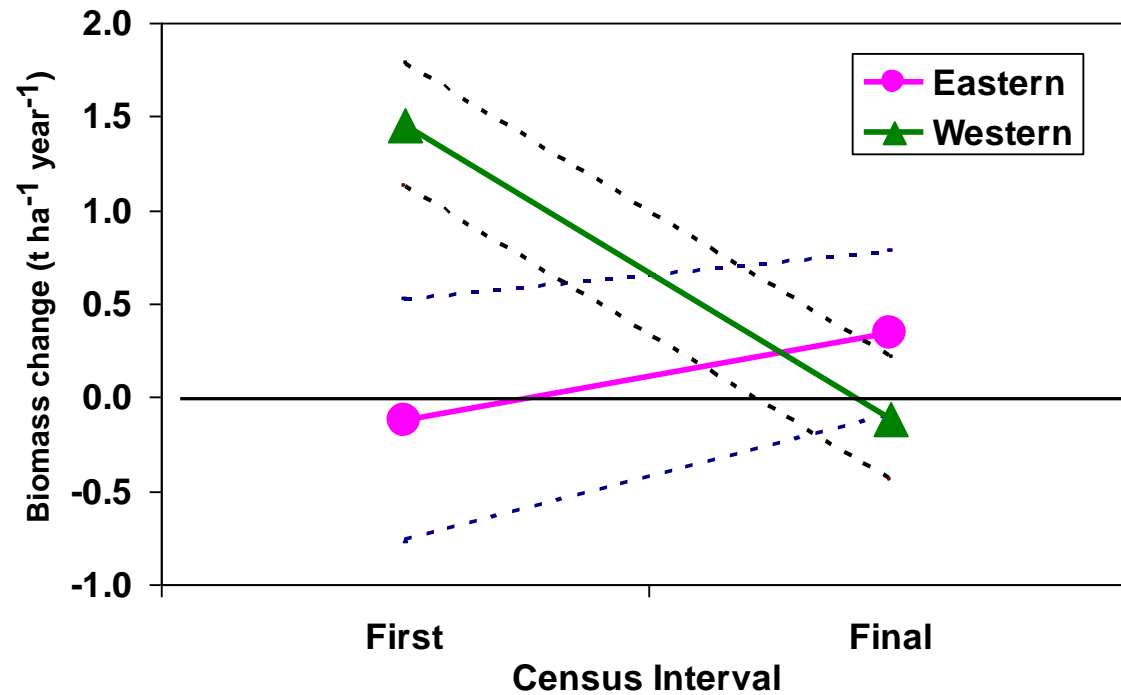

Figure S1. Average rate of biomass change (plus dashed lines representing the 95% confidence intervals) for the first and final census periods for plots in the western and eastern regions. For the western region, the biomass trend changed significantly from increasing during the first census to decreasing during the last census ( $P < 0.0001$ , paired two-sample  $T$ -test); for eastern region, there was no significant change ( $P = 0.1339$ , paired two-sample  $t$ -test). Note that the first and final intervals on the  $x$ -axis only represent the initial and last censuses for each plot, and thus do not reflect the length of the census intervals. The the mean census time between the initial and final census for the western region was 22.8 years, and 19.2 years for the eastern region.



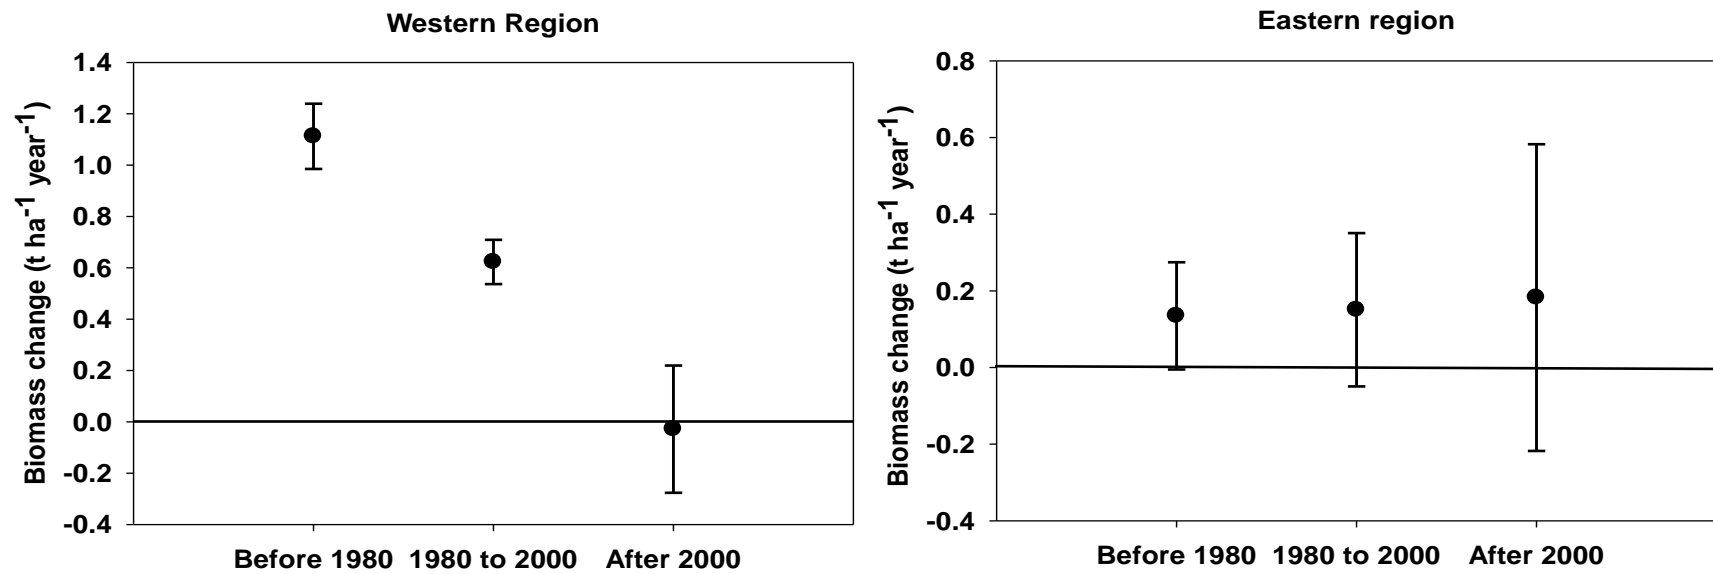

Figure S2. Rate of biomass change for the western and eastern regions during three time intervals. The black dots represent the average rate of biomass change and the range bars is defined as the 95% confidence intervals.

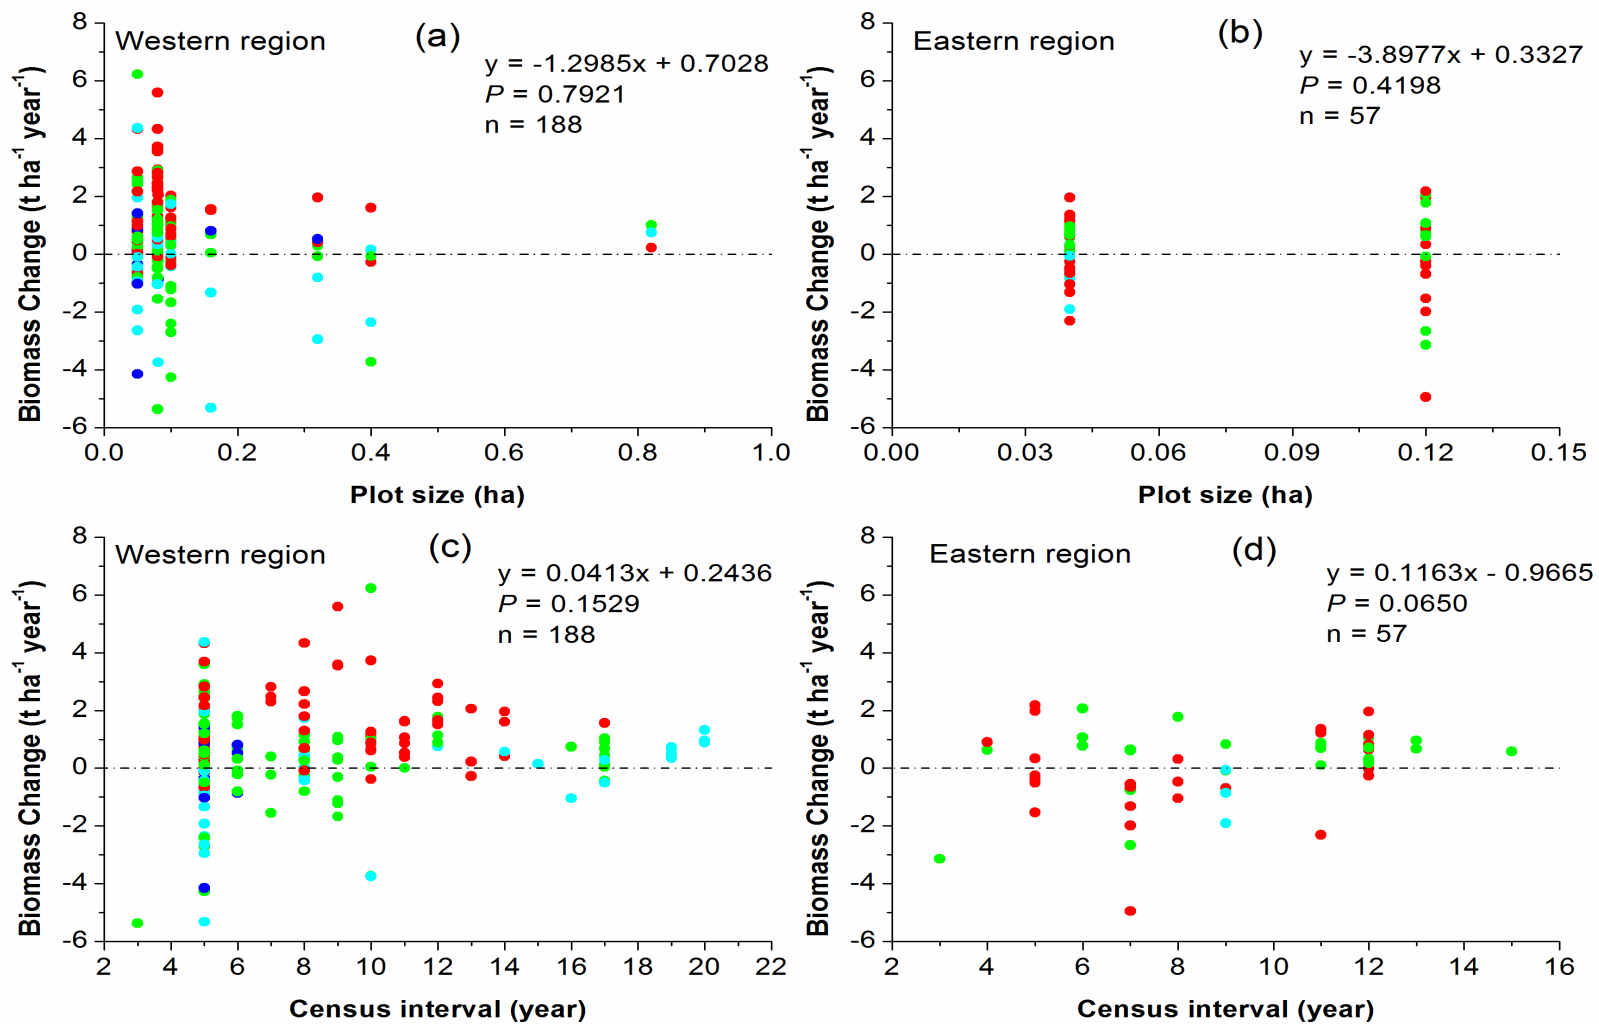

Figure S3. Plots of the rate of biomass change as a function of plot size and census interval for the western and eastern regions. The red, green, light blue and blue dots represent the first, second, third and fourth census respectively.

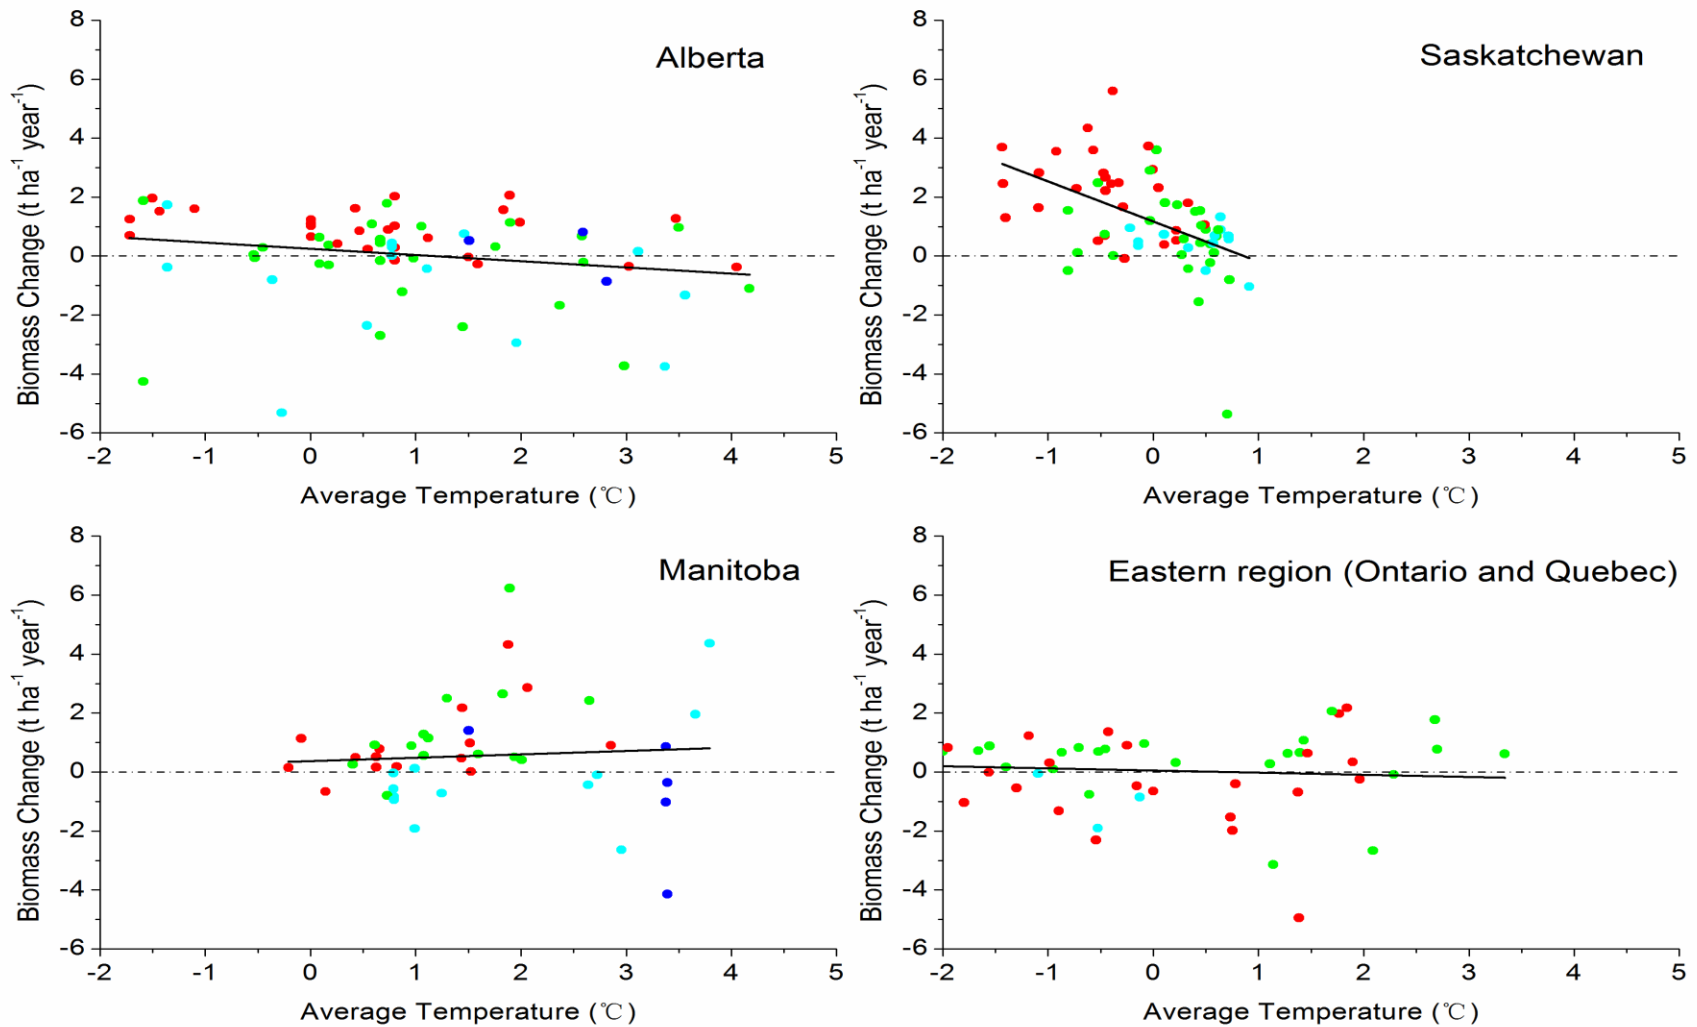

Figure S4. Plots of the biomass change as a function of the average temperature. The average temperature was obtained by averaging temperature observations across all years within each census interval for a given plot. The lines represent the modeled trends from the ordinary least squares regression models. The red, green, light blue and blue dots represent the first, second, third and fourth census respectively.

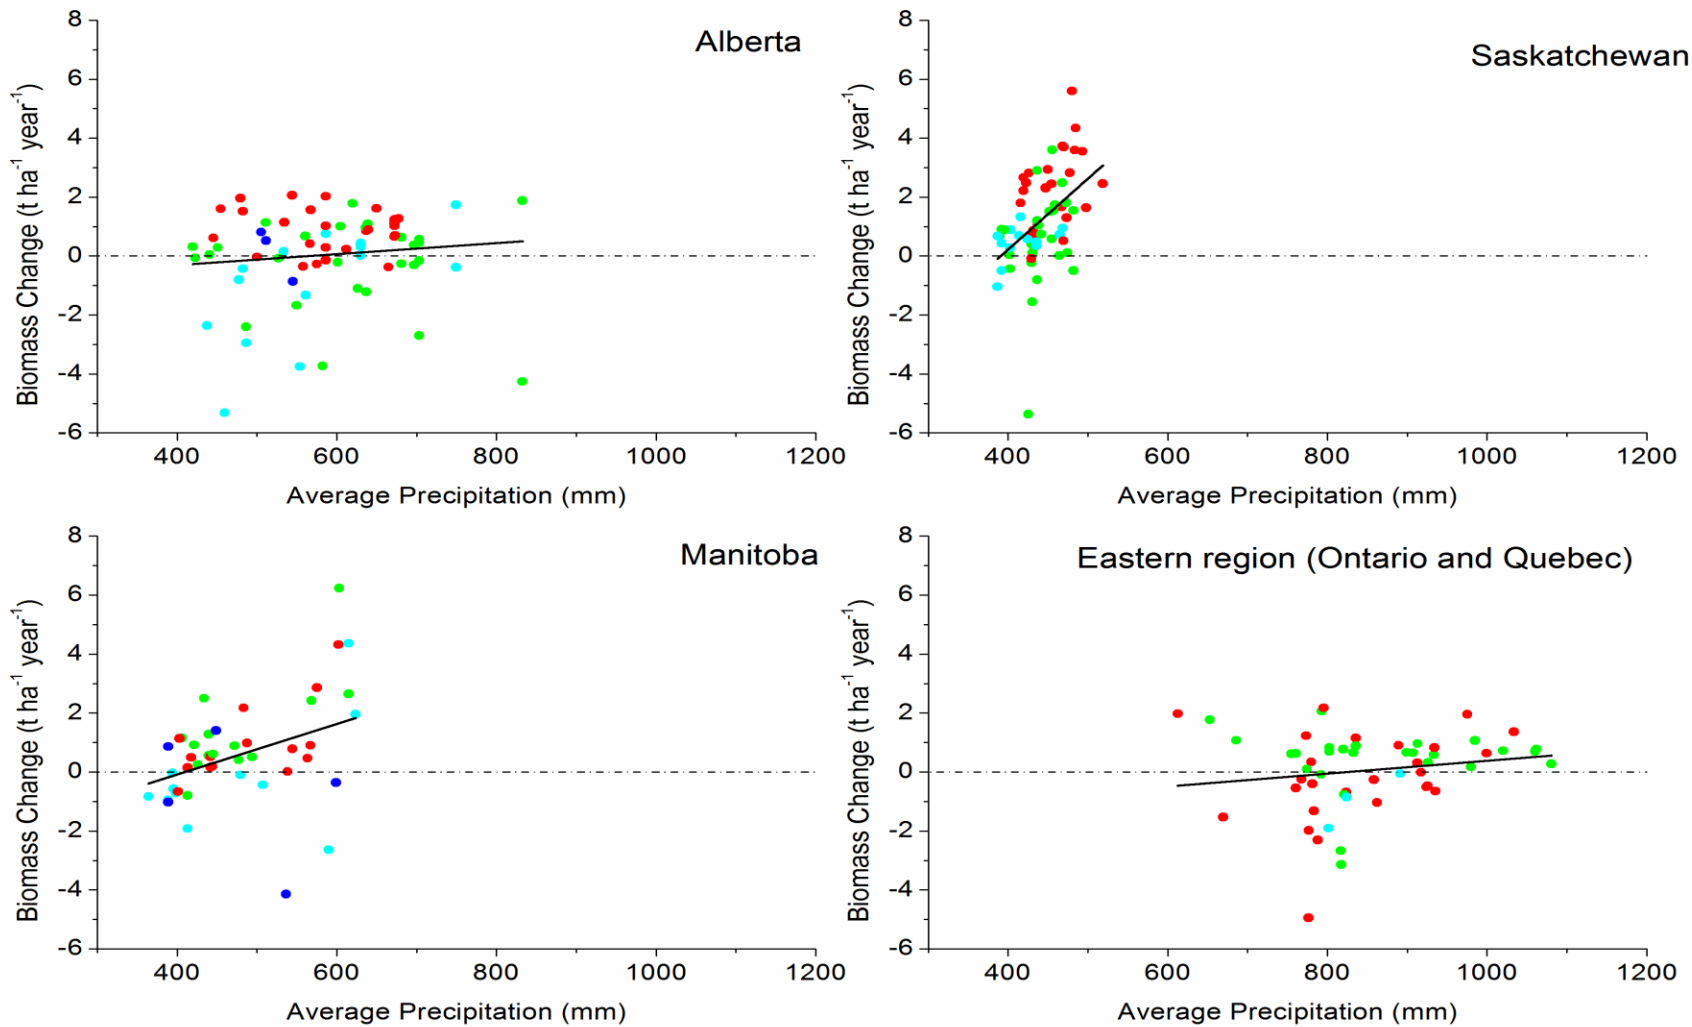

Figure S5. Plots of the biomass change as a function of the average precipitation. The average precipitation was obtained by averaging precipitation observations across all years within each census interval for a given plot. The lines represent the modeled trends from the ordinary least squares regression models. The red, green, light blue and blue dots represent the first, second, third and fourth census respectively.

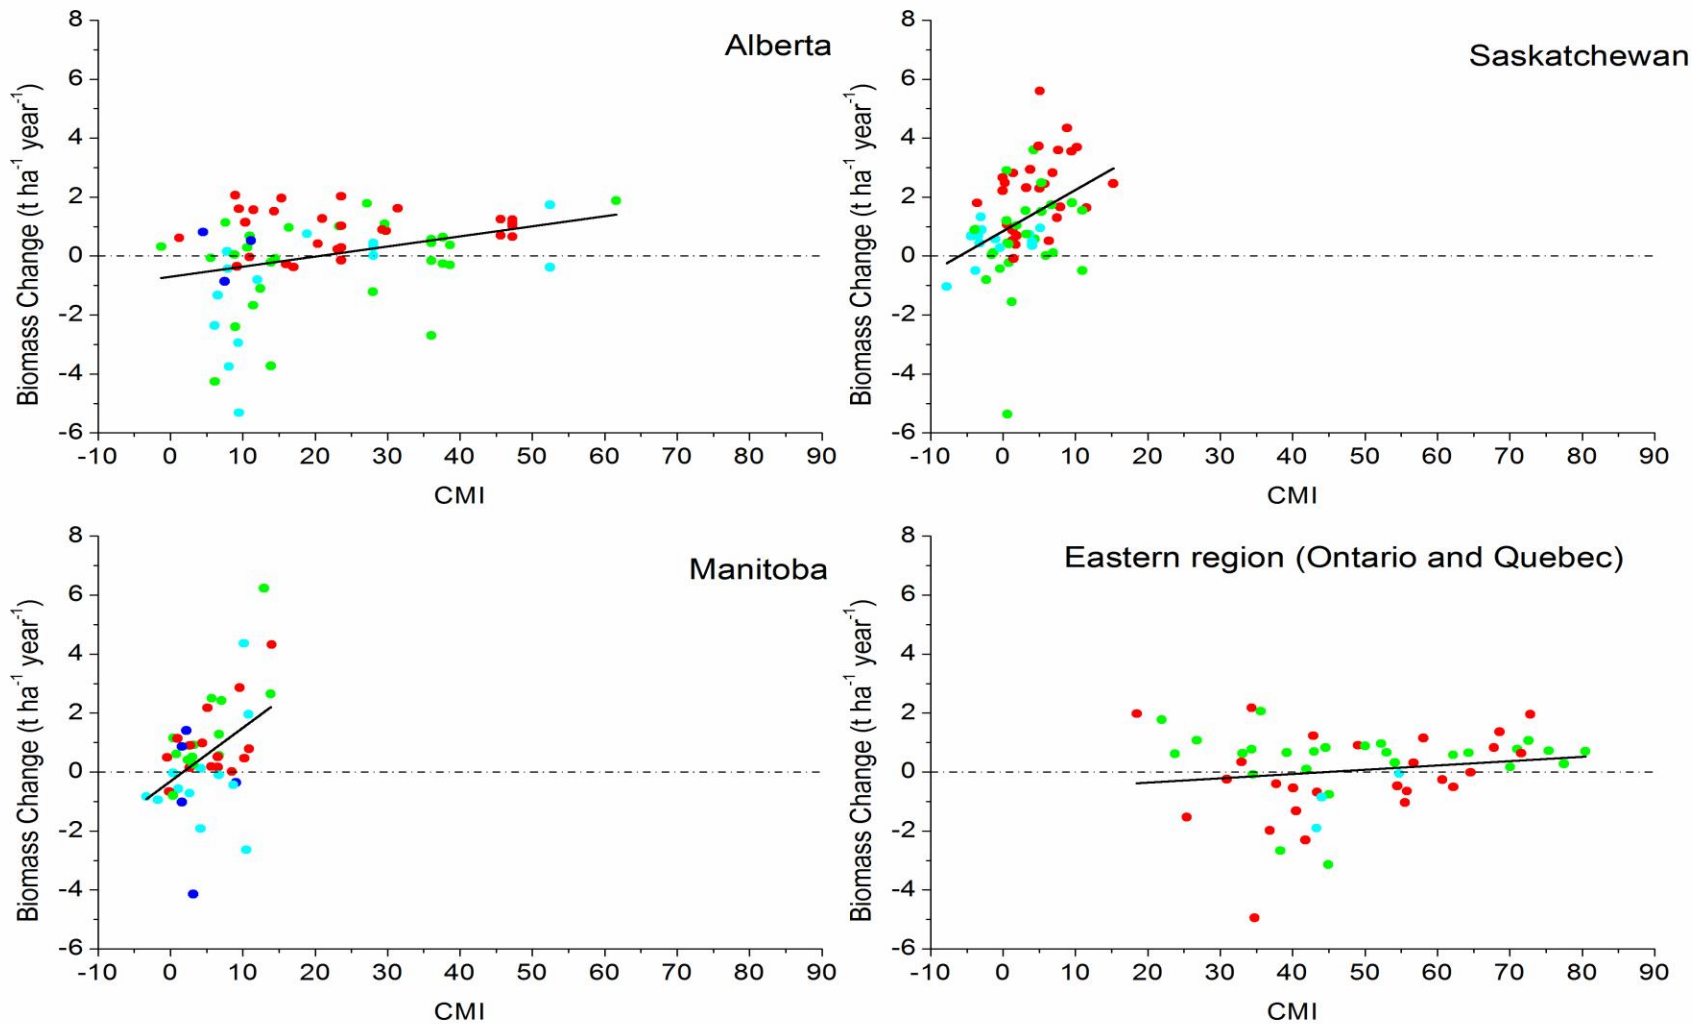

Figure S6. Plots of the biomass change as a function of the average climate moisture index (*CMI*). The average *CMI* was obtained by averaging *CMI* observations across all years within each census interval for a given plot. The lines represent the modeled trends from the ordinary least squares regression models. The red, green, light blue and blue dots represent the first, second, third and fourth census respectively.

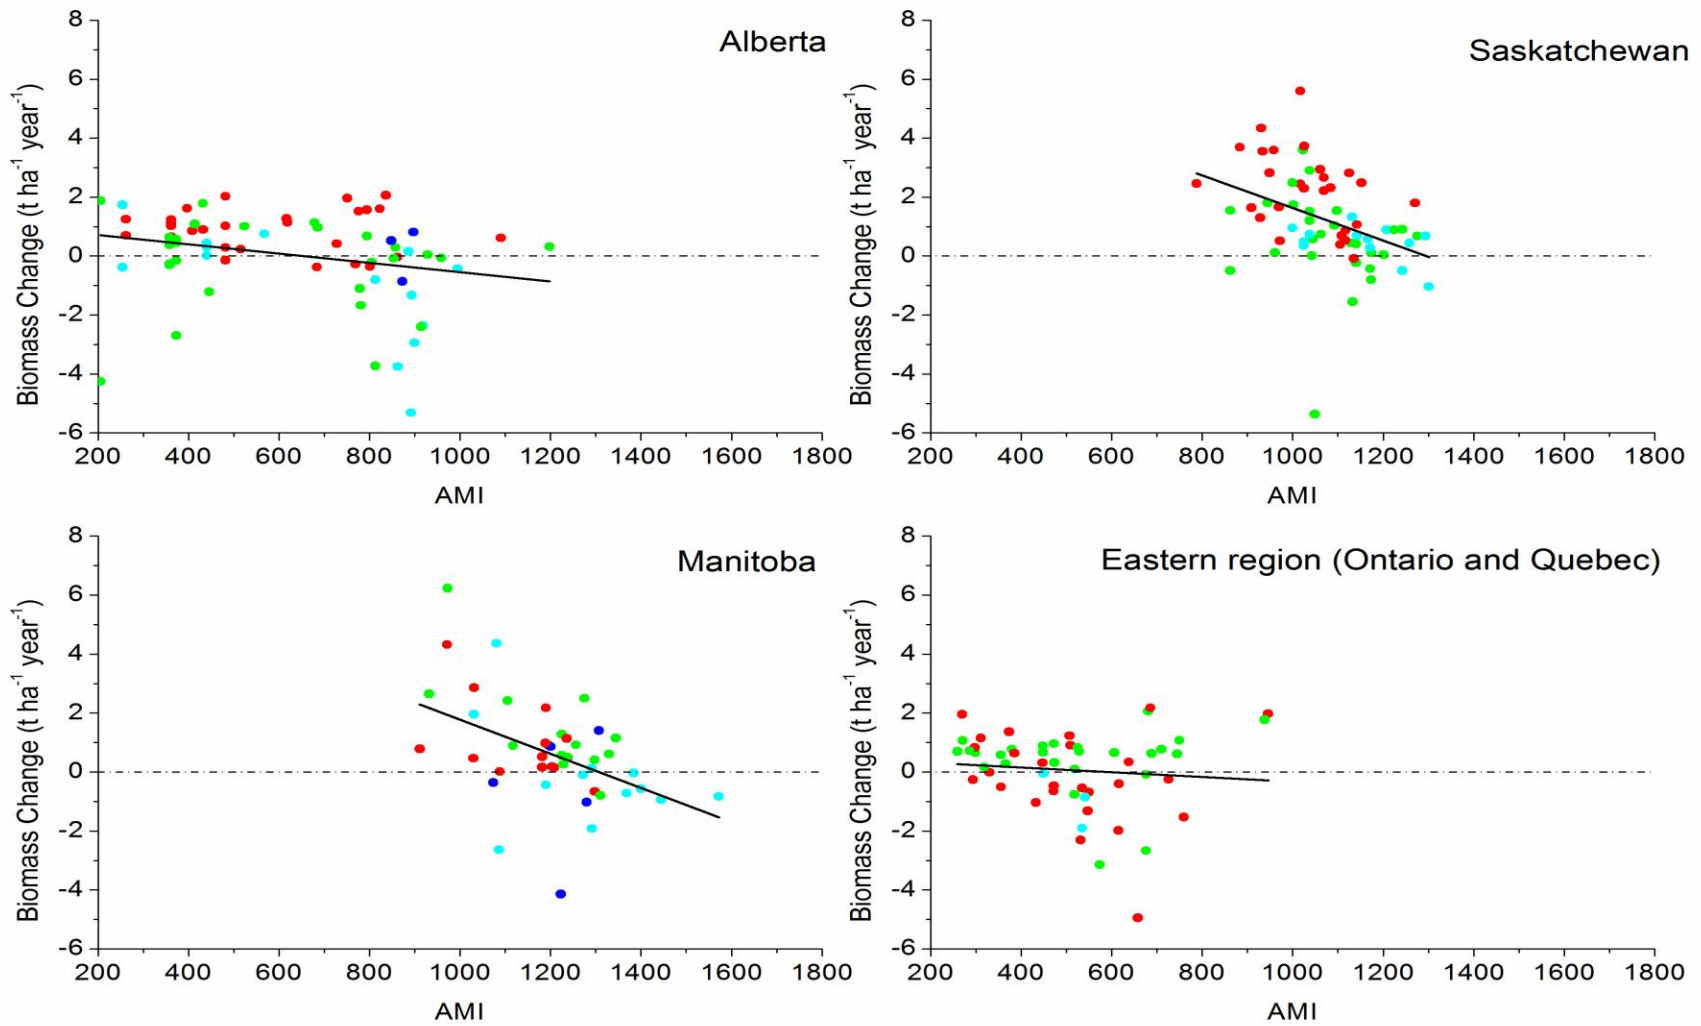

Figure S7. Plots of the biomass change as a function of the average annual moisture index (*AMI*). The average *AMI* was obtained by averaging *AMI* observations across all years within each census interval for a given plot. The lines represent the modeled trends from the ordinary least squares regression models. The red, green, light blue and blue dots represent the first, second, third and fourth census respectively.

## Literature citations

- S1. Boudreault C, Bergeron Y, Gauthier S, Drapeau P (2002) Bryophyte and lichen communities in mature to old-growth stands in eastern boreal forests of Canada. *Can. J. Forest Res.* 32:1080-1093.
- S2. Harper KA, Macdonald SE (2002) Structure and composition of edges next to regenerating clear-cuts in mixed-wood boreal forest. *Journal of Vegetation Science* 13:535.
- S3. Alberta permanent sample plot (PSP) field procedures manual. (2005) Public Lands and Forests Division, Forest Management Branch 8<sup>th</sup> FL, 9920-108 Street Edmonton, AB. T5K 2M4. Phone: (780)427-8474. website: <http://www.srd.alberta.ca/ManagingPrograms/ForestManagement/PermanentSamplePlots/ForestManagementBranchPSPManuals.aspx>, last accessed November 22, 2010.
- S4. Gordon EF (1981) Saskatchewan growth and yield survey field procedures manual Department of Tourism and Renewable Resources Forestry Branch, Forest Inventory Section.
- S5. Manitoba provincial forest inventory field instructions. (1998) Forestry Branch of Manitoba.
- S6. Hayden J et al. (1995) Ontario forest growth and yield program field manual. Ontario Ministry of Natural Resources and Ontario Forest Research Institute, P.O.Box 969, 1235 Queen Street East, Sault Ste. Marie, Ontario, P6A 5N5.
- S7. Duchesne L, Ouimet R (2008) Population dynamics of tree species in southern Québec, Canada: 1970–2005. *For. Ecol. Manage.* 255:3001-3012.
- S8. *Daily 10 Km Gridded Climate Dataset: 1961-2003*. (2007) [computer file]. Version 1.0, [Ottawa]: Agriculture and Agri-Food Canada. National Land and Water Information Service.
- S9. Hutchinson MF (2004) ANUSPLIN Version 4.36. Centre for Resource and Environmental Studies, Australian National University.

- S10. Hogg EH (1997) Temporal scaling of moisture and forest-grassland boundary in western Canada. *Agri. For. Meteorol.* 84:115-122.
- S11. Rehfeldt GE (2006) Empirical analyses of plant-climate relationships for the western United States. *Int. J. Plant Sci.* 167:1123-1150.
- S12. Lambert MC, Ung CH, Raulier F (2005) Canadian national tree aboveground biomass equations. *Can. J. For. Res.* 35:1996-2018.
- S13. Phillips OL et al. (1998) Changes in the carbon balance of tropical forests : evidence from long-term plots. *Science* 282:439-442.
- S14. Smith FW, Long JN (2001) Age-related decline in forest growth: an emergent property. *For. Ecol. Manage.* 144:175-181.
- S15. Gower ST, McMurtrie RE, Murty D (1996) Aboveground net primary production decline with stand age: potential causes. *Trends Ecol. Evol.* 11:378-382.
- S16. Brandt JP (2009) The extent of the north American boreal forest. *Environmental Reviews* 17:101-161.
